# Supplementary material
Source: HighWire-hosted journal article supplement (https://jitc.bmj.com/content/8/2/e000692)
Supplement: inline-supplementary-material-2 [file inline-supplementary-material-2.pdf]

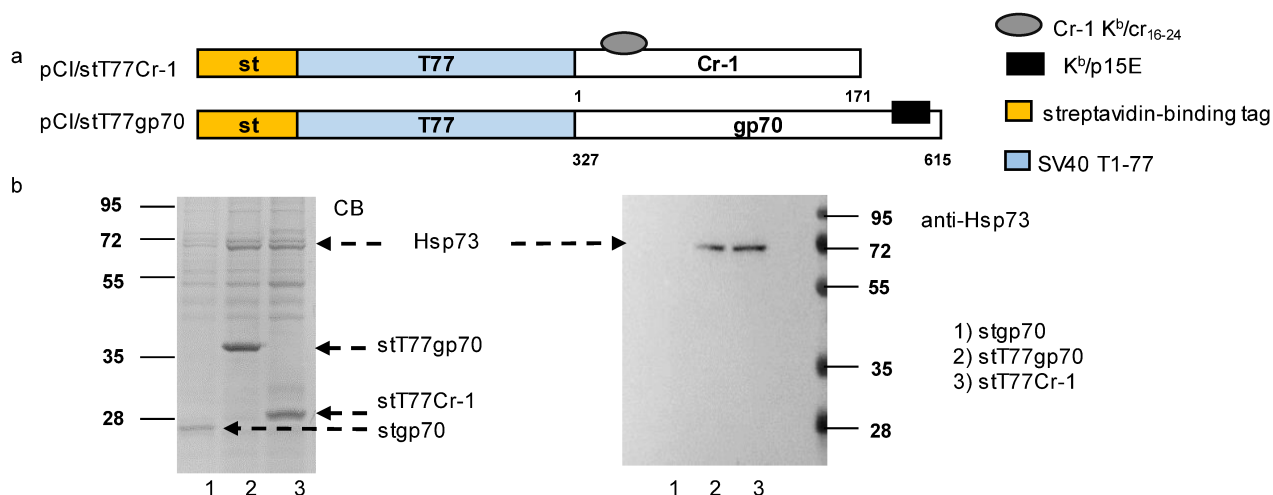**Figure S2****Vector constructs that prevent ER expression of Cr-1 and gp70**

(a) Schematic presentation of Hsp73-binding gp70 and Cr-1 antigens, composed of a NH<sub>2</sub>-terminal streptavidin binding tag (st), the 77-residue Hsp73 binding domain of the SV40 T-Ag (T77) and either the entire Cr-1 or a gp70<sub>327-615</sub> fragment. (b) 2.5 × 10<sup>7</sup> HEK-293 cells were transiently transfected with pCI/stgp70 (lane 1), pCI/stT77gp70 (lane 2) and pCI/stT77Cr-1 (lane 3) and lysed 48 h post transfection. Proteins were subsequently purified using the Strep-tag/Strep-Tactin® System from IBA (<http://www.iba-lifesciences.com/strep-tag.html>), following the manufacturer's description. Purified fractions were processed for 12.5% SDS-PAGE followed by Coomassie Blue staining (CB) of the gel or by anti-Hsp73 specific western blotting using an anti-Hsc70/Hsp73 antibody (cat. no. ADI-SPA-816F, Enzo Life Sciences GmbH, Lörrach, Germany).
