# Supplementary material
Source: HighWire-hosted journal article supplement (https://jitc.bmj.com/content/8/2/e000692)
Supplement: inline-supplementary-material-7 [file inline-supplementary-material-7.pdf]

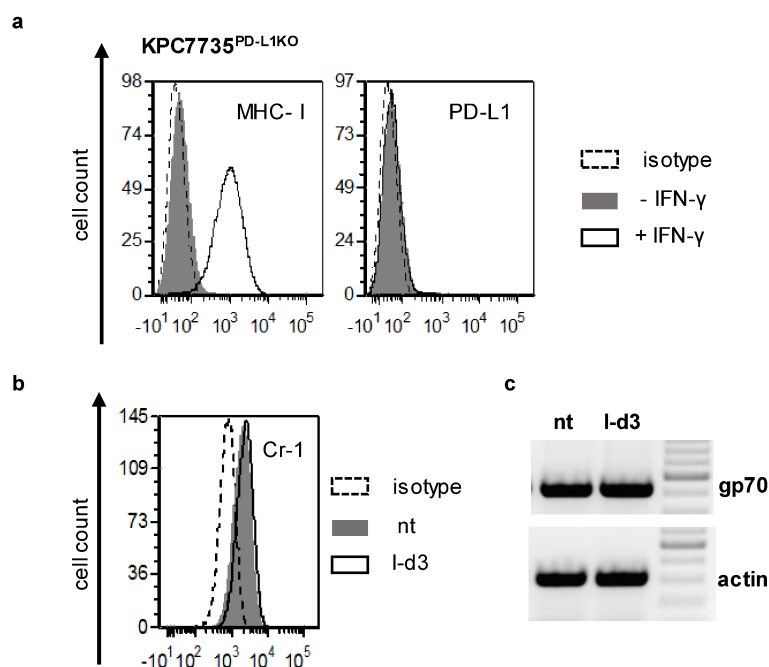**Figure S5****Characterization of KPC7735<sup>PD-L1KO</sup> cells**

**a)** The CD274-KN2.0, mouse gene knockout kit (cat. no. KN502893, OriGene) was used to generate PD-L1-deficient KPC7735<sup>PD-L1KO</sup> cells following the manufacturer's recommendations. KPC7735<sup>PD-L1KO</sup> cells were either untreated or treated with 20 ng/ml recombinant mouse IFN- $\gamma$  for 20 h, followed by FCM analysis of MHC-I (H2-K<sup>b</sup>) and PD-L1 surface expression. One representative histogram out of three independent experiments is shown. **(b)** Expression of Cr-1 protein in KPC7735<sup>PD-L1KO</sup> cells on d3 post IFN $\gamma$ -treatment (20 ng/ml, 20 h) (I-d3), compared to non-treated cells (nt), was determined by FCM analysis using a primary rabbit anti-mouse TDGF1 antibody and a secondary APC-conjugated goat  $\alpha$ -rabbit IgG. One representative histogram per out of two independent experiments is shown. **(c)** Relative expression of gp70 (upper panel) compared to actin (lower panel) in non-treated KPC7735<sup>PD-L1KO</sup> cells (nt) compared to cells on d3 post IFN- $\gamma$ -treatment (I-d3) was determined by semi-quantitative RT-PCR. Representative Gp70 and actin specific PCR bands out of two independent experiments are shown.
