# Supplementary material
Source: HighWire-hosted journal article supplement (https://jitc.bmj.com/content/8/2/e000692)
Supplement: inline-supplementary-material-10 [file inline-supplementary-material-10.pdf]

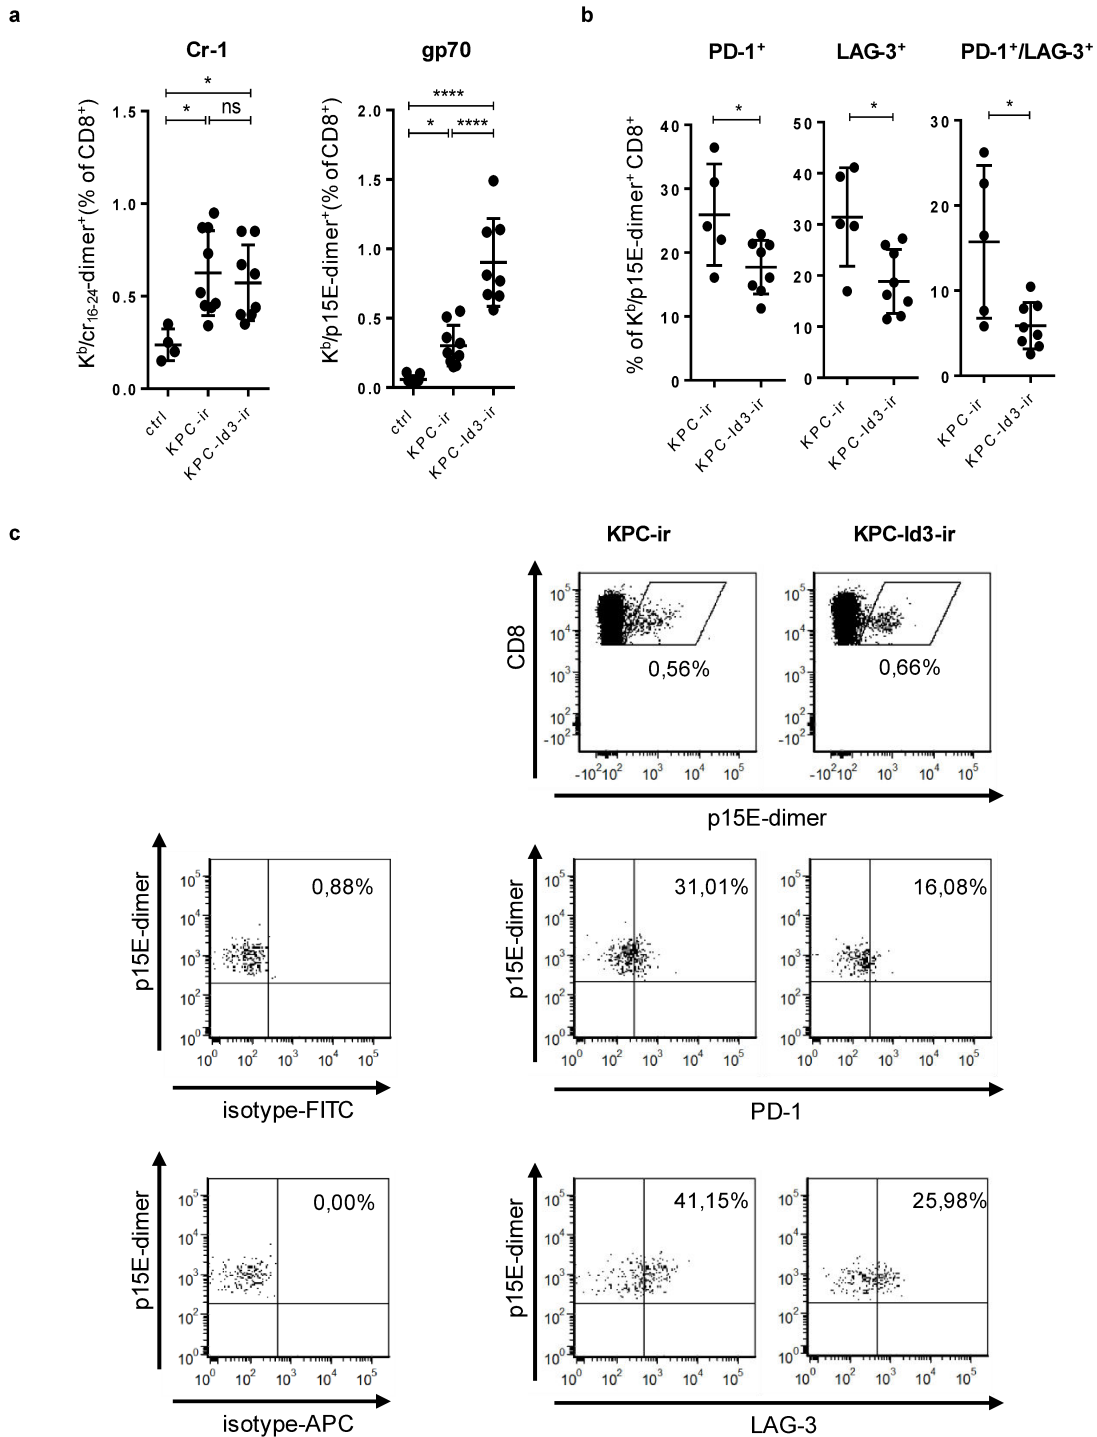**Figure S8****Flow cytometric analyses of vaccine-primed gp70:K<sup>b</sup>/p15E-dimer<sup>+</sup> PD-1<sup>+</sup> LAG-3<sup>+</sup> CD8 T cells**

**Figure S8 continued**

(a) B6 mice were untreated (ctrl, n=4), injected with  $2.5 \times 10^5$  irradiated KPC7735 cells (KPC-ir; n=9) or IFN- $\gamma$ -treated KPC7735 cells irradiated at d3 post IFN- $\gamma$  treatment start (KPC-Id3-ir; n=8). On day 12 post immunization, Cr-1:K<sup>b</sup>/cr<sub>16-24</sub><sup>-</sup> and gp70:K<sup>b</sup>/p15E-specific CD8 T-cell frequencies were determined in the spleen. Graphs show the actual proportions (%) of K<sup>b</sup>/cr<sub>16-24</sub><sup>-</sup>-dimer<sup>+</sup> and K<sup>b</sup>/p15E-dimer<sup>+</sup> cells among all CD8 T cells  $\pm$  SD and combine data out of two independent experiments. For statistical evaluation, groups were compared using one-way ANOVA (with 95% CI) followed by Tukey's multiple comparisons test ( $p < 0.05$  (\*),  $p < 0.0001$  (\*\*\*\*), ns, not significant).

(b) Expression of PD-1 and LAG-3 was assessed on the K<sup>b</sup>/p15E-dimer<sup>+</sup> CD8 T-cell populations in the spleens of B6 mice vaccinated with KPC-ir cells (n=5, data from one experiment) and KPC-Id3-ir cells (n=8, combined data from the two independent experiments also shown in (a)). Graphs show the frequencies (%) of PD-1<sup>+</sup>, LAG-3<sup>+</sup> and PD-1/LAG-3 double positive cells among all K<sup>b</sup>/p15E-dimer<sup>+</sup> CD8 T cells  $\pm$  SD. Groups were compared using unpaired student's t test ( $p < 0.05$  (\*)).

(c) One representative dot blot per group is shown.
