# Supplementary material
Source: HighWire-hosted journal article supplement (https://jitc.bmj.com/content/8/2/e000692)
Supplement: inline-supplementary-material-13 [file inline-supplementary-material-13.pdf]

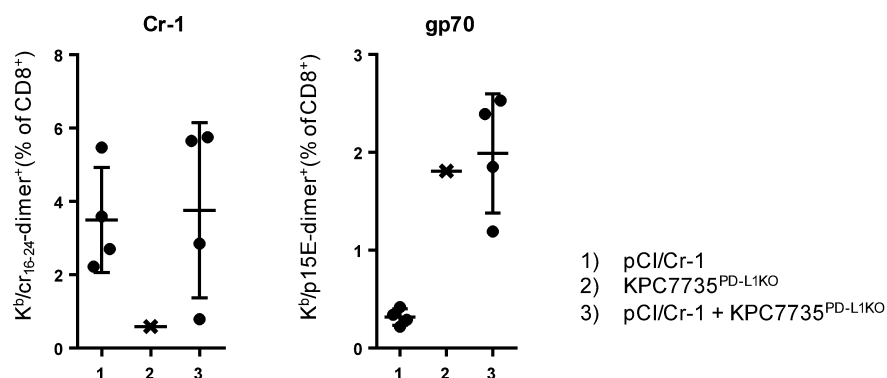**Figure S11****Co-priming of K<sup>b</sup>/cr<sub>16-24</sub> and K<sup>b</sup>/p15E-dimer<sup>+</sup> CD8<sup>+</sup> T cells by DNA- and cell-based co-immunization**

B6 mice were immunized with pCI/Cr-1 i.m. (group 1, n=4), KPC7735<sup>PD-L1KO</sup> cells (group 2; see also Fig.5c) or simultaneously received i.m. injection of pCI/Cr-1 plasmid-DNA and s.c. injection of KPC7735<sup>PD-L1KO</sup> cells (group 3, n=4). Twelve days post immunization K<sup>b</sup>/p15E-dimer<sup>+</sup> and K<sup>b</sup>/cr<sub>16-24</sub>-dimer<sup>+</sup> CD8<sup>+</sup> T cells were analyzed in the spleens of immunized mice. Frequencies of dimer<sup>+</sup> CD8<sup>+</sup> T cells shown in the graphs were background corrected against pCI sham-immunized mice. Data shown in single values with mean ± SD were generated in one experiment. The mean values of the respective dimer<sup>+</sup> CD8<sup>+</sup> T-cell frequencies primed in B6 mice by KPC7735<sup>PD-L1KO</sup> cells (already shown figure 5c), were made in the graphs as x.
